# Supplementary material for: Porous-sheet-assembled Ni(OH)2/NiS arrays with vertical in-plane edge structure for supercapacitors with high stability
Source: Royal Society of Chemistry journal article supplement (doi:10.1039/c9dt03675j), 2019-01-01
Supplement: c9dt03675j1.pdf [file c9dt03675j1.pdf]

## Porous-sheet-assembled Ni(OH)<sub>2</sub>/NiS arrays with vertical in-plane edge structure for supercapacitor with high stability

Lei Zhang<sup>a</sup>, Hui Wang<sup>a</sup>, Shan Ji<sup>a,b\*</sup>, Xuyun Wang<sup>a</sup>, Rongfang Wang<sup>a\*\*</sup>

<sup>a</sup> State Key Laboratory Base for Eco-Chemical Engineering, College of Chemical Engineering, Qingdao University of Science and Technology, Qingdao, 266042, China.

<sup>b</sup> College of Biological, Chemical Science and Chemical Engineering, Jiaxing University, Jiaxing, 314001, China.

Corresponding authors:

Shan Ji (\*): [jishan@zjxu.edu.cn](mailto:jishan@zjxu.edu.cn), Tel./fax: +86 (573)83643264

Rongfang Wang (\*\*): [rffwang@qust.edu.cn](mailto:rffwang@qust.edu.cn), Tel./fax: +86(532)84022879

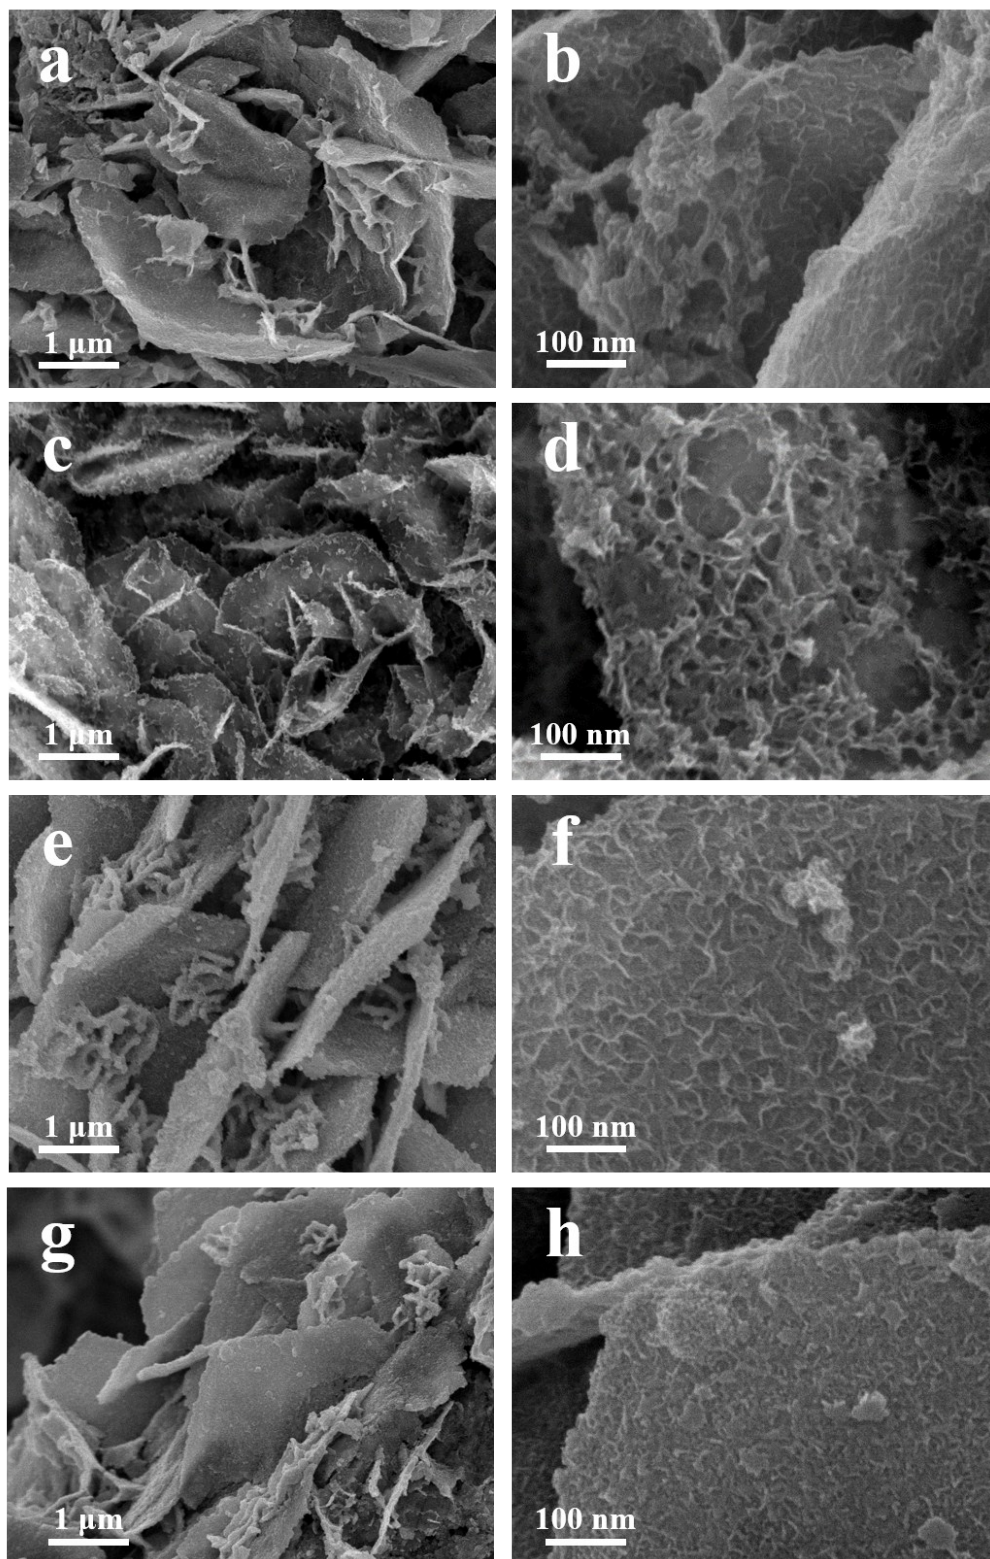

Figure S1. High and low magnification SEM images of Ni(OH)<sub>2</sub>/NiS/CC with electroplating time of 200 s (a, b), 600s (c, d), 1200s (e, f), and 2000s (g, h).

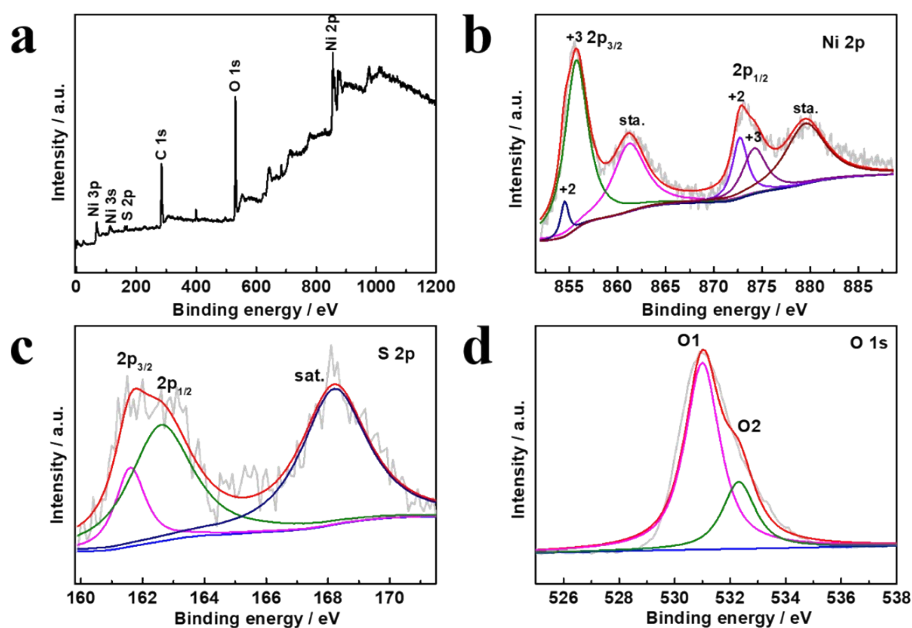

Figure S2. (a) Survey XPS spectrum of Ni(OH)<sub>2</sub>/NiS/CC (0.10 g of NH<sub>4</sub>F); its corresponding high-resolution XPS curves of Ni 2p (b), S 2p (c) and O 1s (d).

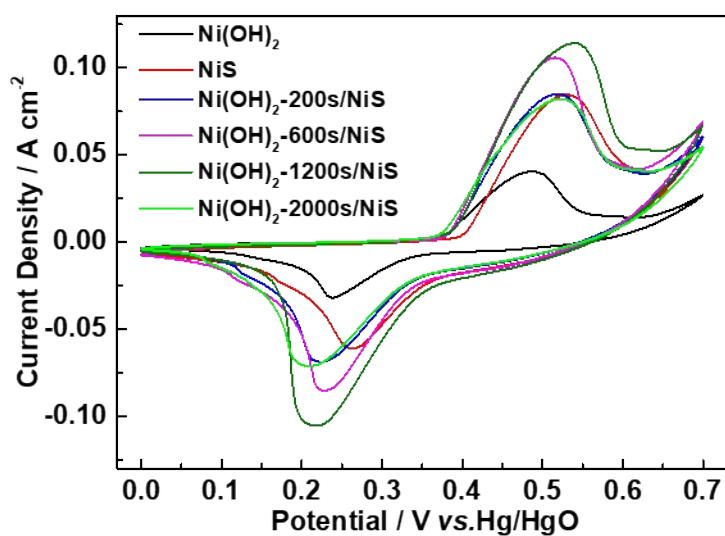

Figure S3. (a) CV curves of Ni(OH)<sub>2</sub>-1200s, NiS, and Ni(OH)<sub>2</sub>/NiS/CC with various of electroplating times (200s, 600s, 1200s, 2000s) measured at 5 mV s<sup>-1</sup>.

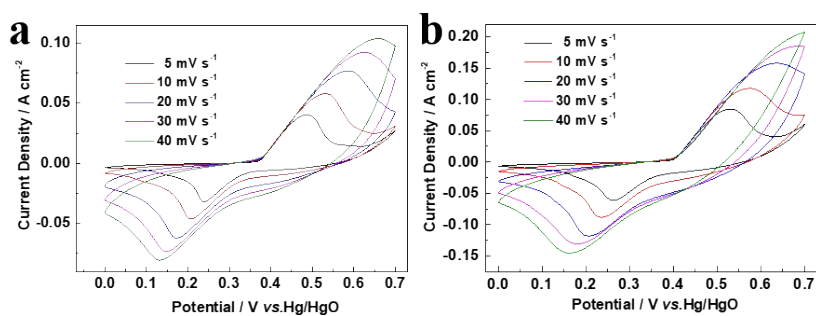

Figure S4. CV curves of Ni(OH)<sub>2</sub>/CC (a), NiS/CC (b) measured at different scan

rate.

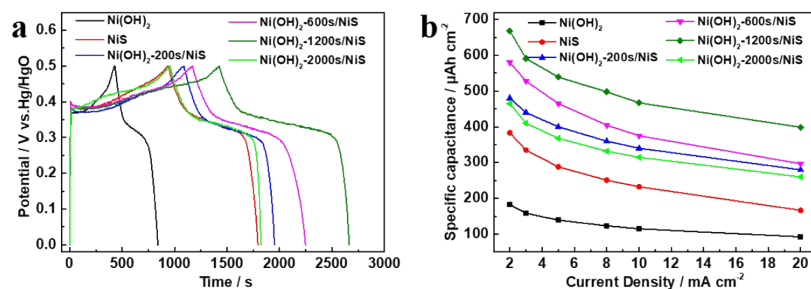

Figure S5. (a) Galvanostatic charge-discharge (GCD) curves of Ni(OH)<sub>2</sub>-1200s, NiS, and Ni(OH)<sub>2</sub>/NiS/CC with various of electroplating times (200s, 600s, 1200s, 2000s) measured at 2 mA cm<sup>-2</sup>; (b) Areal capacity values of the as-prepared electrodes measured at different current densities.

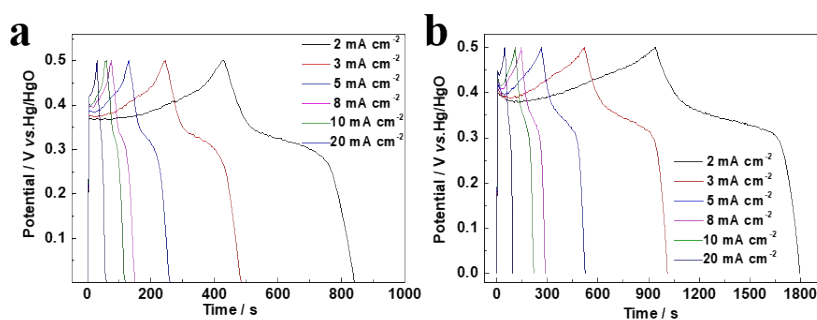

Figure S6. Galvanostatic charge-discharge (GCD) curves of (a) NiS/CC and (b) Ni(OH)<sub>2</sub>/Ni<sub>2</sub>/CC samples at different current densities.

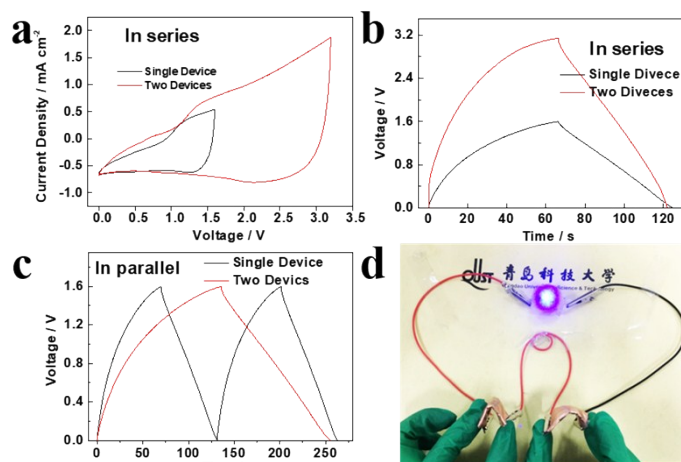

Figure S7. (a) CV curves of two SASCs connected in series. (b) GCD curve of two

SASCs connected in series. (c) GCD curves of ASCs connected in parallel over same voltage range. (d) picture of LED powered by two SASCs connected in series.

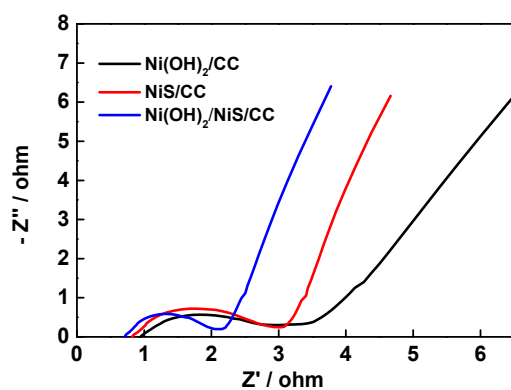

Figure S8. EIS curves of  $\text{Ni(OH)}_2/\text{CC}$ ,  $\text{NiS}/\text{CC}$ ,  $\text{Ni(OH)}_2/\text{NiS}/\text{CC}$  samples.

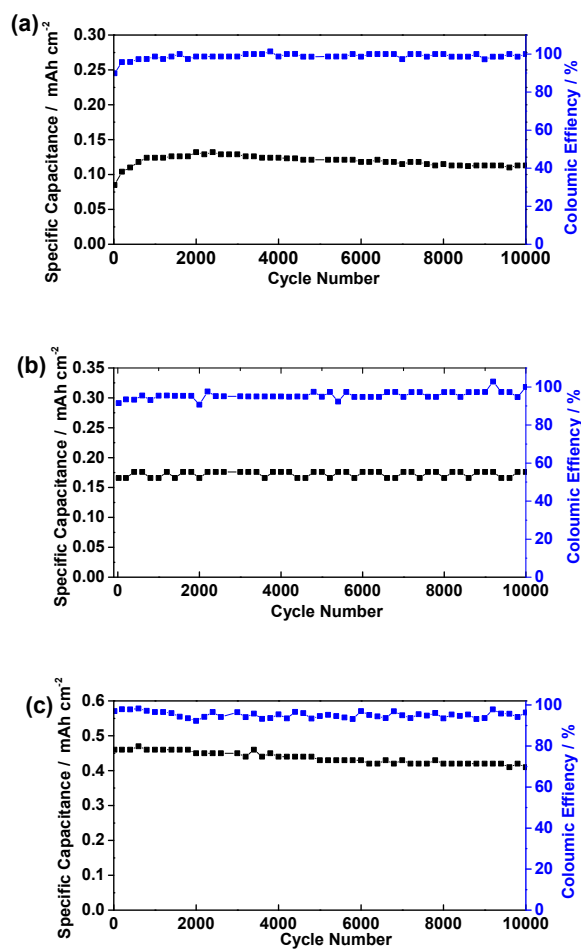

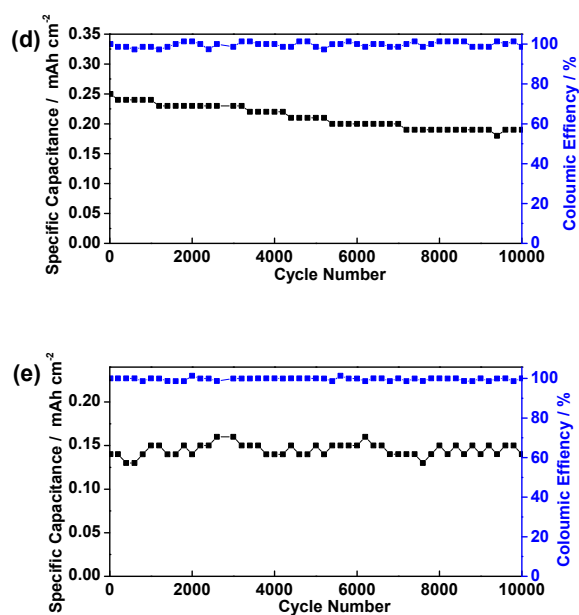

Figure S9. (a) Long-term stability curves of Ni(OH)<sub>2</sub>/CC//AC tested at 10 mA cm<sup>-2</sup> (b) Long-term stability curves of NiS/CC//AC tested at 10 mA cm<sup>-2</sup>. (c) Long-term stability curves of Ni(OH)<sub>2</sub>/NiS/CC tested at 10 mA cm<sup>-2</sup>. (d) Long-term stability curves of NiS/CC tested at 10 mA cm<sup>-2</sup>. (e) Long-term stability curves of Ni(OH)<sub>2</sub>/CC tested at 10 mA cm<sup>-2</sup>.

Table S1. Comparison of the capacitor performance of as-prepared Ni(OH)<sub>2</sub>/Ni<sub>3</sub>S<sub>2</sub>/CC electrode with other reported nickel sulfide compound-based electrodes

| Electrode materials         | Specific Capacitance (F cm <sup>-2</sup> ) | Energy density (Wh kg <sup>-1</sup> ) | Power density (W kg <sup>-1</sup> ) | Cycle number | Percentage | Reference                                                   |
|-----------------------------|--------------------------------------------|---------------------------------------|-------------------------------------|--------------|------------|-------------------------------------------------------------|
| Ni(OH) <sub>2</sub> /NiS/CC | 6.357                                      | 100.95                                | 18.17                               | 10000        | 97 %       | This work                                                   |
| NiS@Ni(OH) <sub>2</sub>     | 3.85                                       |                                       |                                     | 2000         | 99.1 %     | Energy & Environmental Science, 2013, 6(7): 2216-2221.      |
| 3D NiS nanosheet            | 2.74                                       | 35                                    | 2.62                                | 6500         | 91.4 %     | Journal of Materials Chemistry A, 2014, 2(36): 15111-15117. |
| NiS nanosheet               | 3.6                                        | 55                                    | 3.55                                | 5000         | 89.3 %     | NPG Asia Materials, 2016, 8(8): e300.                       |
| NiS <sub>2</sub> nanosheets | 1.34                                       |                                       |                                     | 3000         | 93.6 %     | RSC Advances, 2015, 5(32): 25446-25449.                     |

|                                            |      |       |       |      |        |                                                                |
|--------------------------------------------|------|-------|-------|------|--------|----------------------------------------------------------------|
| Flower-Like Ni <sub>3</sub> S <sub>2</sub> | 5.32 | 37.19 | 7.99  | 5000 | 85.6 % | Electrochimica Acta, 2016,<br>191: 705-715.                    |
| Hierarchical NiS                           | 6.09 | 25.5  | 10.8  | 1000 | 69 %   | Chemical Engineering<br>Journal, 2014, 251: 116-<br>122.       |
| Ni <sub>3</sub> S <sub>2</sub> nanoarrays  | 2.47 | 82.98 | 9.63  | 2000 | 86.7 % | Chemical Engineering<br>Journal, 2017, 322: 498-<br>509.       |
| NiS@CdS/NF                                 | 3.15 | 127.5 | 0.995 | 4000 | 130 %  | Journal of Materials<br>Chemistry A, 2017,5(15):<br>7165-7172. |
| Ni(OH) <sub>2</sub> /ZnO                   | 4.35 | 51.5  | 9.0   | 1000 | 85 %   | Journal of Power Sources,<br>2016, 308: 29-36.                 |
| Ni(OH) <sub>2</sub>                        | 2.71 |       |       | 1000 | 82 %   | Chemical Communications,<br>2015, 51(15): 3053-3056.           |
| Ni(OH) <sub>2</sub> nanosheets             | 3.21 | 36.2  | 21    | 1000 | 92 %   | Journal of Power Sources,<br>2014, 246: 371-376.               |
| Ni(OH) <sub>2</sub> nanosheet              | 4.15 | 75    | 20    | 5000 | 80 %   | Electrochimica Acta, 2016,<br>211: 44-51.                      |
| α-Ni(OH) <sub>2</sub>                      | 3.12 | 25    | 1     | 5000 | 84 %   | Electrochimica Acta, 2019,<br>297: 173-187.                    |
